# Supplementary material for: Nanoparticle-aggregated octahedral copper hierarchical nanostructures
Source: Royal Society of Chemistry journal article supplement (doi:10.1039/c0ce00565g), 2010-11-01
Supplement: c0ce00565g.pdf [file c0ce00565g.pdf]

Electronic supplementary information

## Nanoparticle-Aggregated Octahedral Copper Hierarchical Nanostructures

Shaodong Sun, Chuncai Kong, Dongchu Deng, Xiaoping Song, Bingjun Ding, and Zhimao Yang\*

*School of Science, MOE Key Laboratory for Non-Equilibrium Synthesis and Modulation of Condensed Matter,*

*State Key Laboratory for Mechanical Behavior of Materials, Xi'an Jiaotong University, Xi'an 710049, ShaanXi,*

*People's Republic of China*

\* Corresponding Author. *E-mail: zmyang@mail.xjtu.edu.cn*

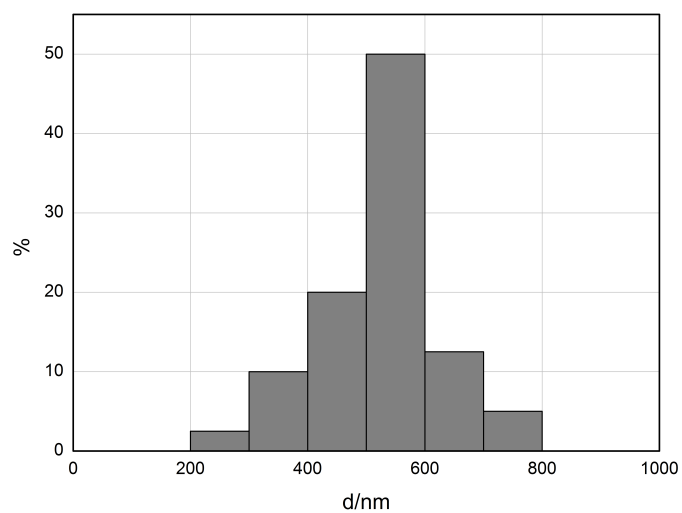

**Fig. S1** The size-distribution diagram of as-prepared products.

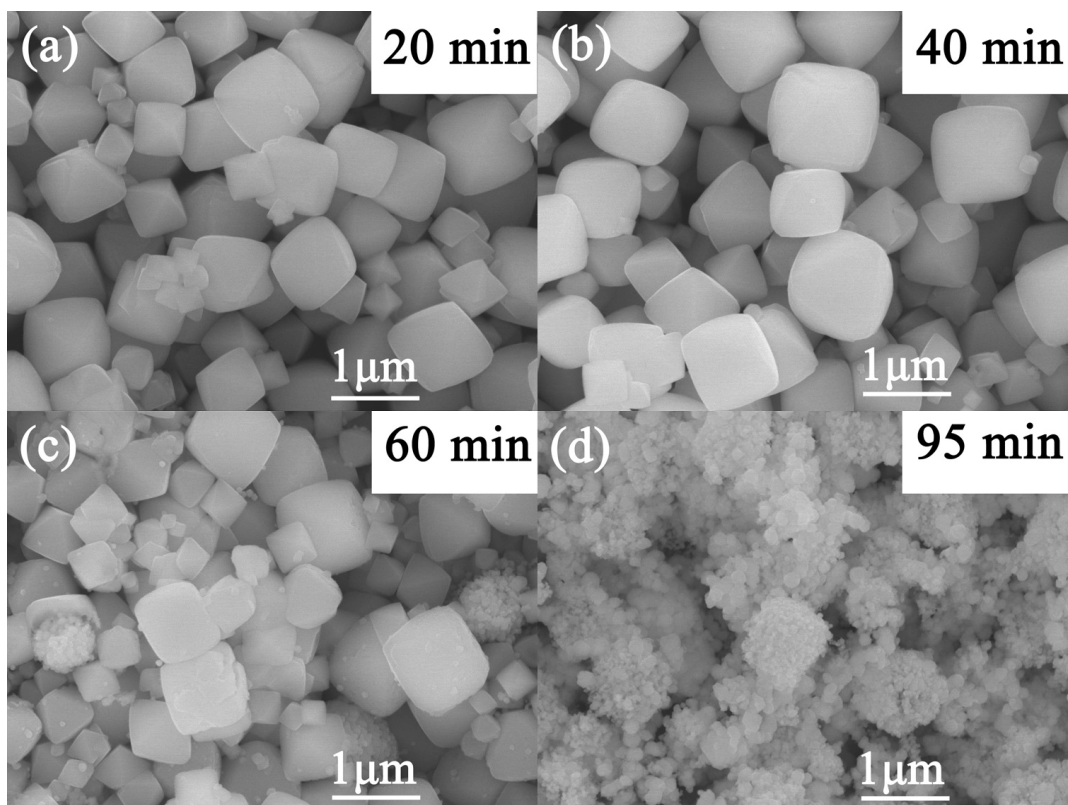

**Fig. S2** FESEM images of the products obtained at different reaction time without heating. (a) 20 min; (b) 40 min; (c) 60 min; (d) 90 min.

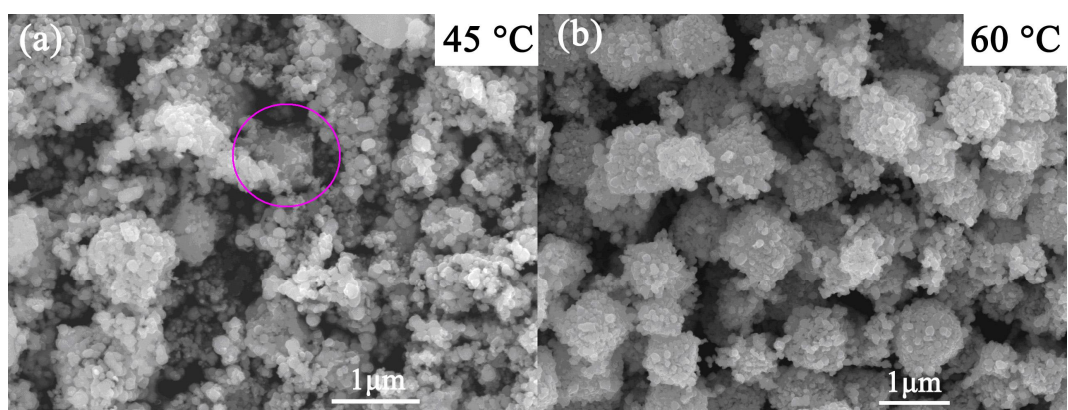

**Fig. S3** FESEM images of the products obtained at different reaction temperature. (a) 45 °C; (b) 60 °C.

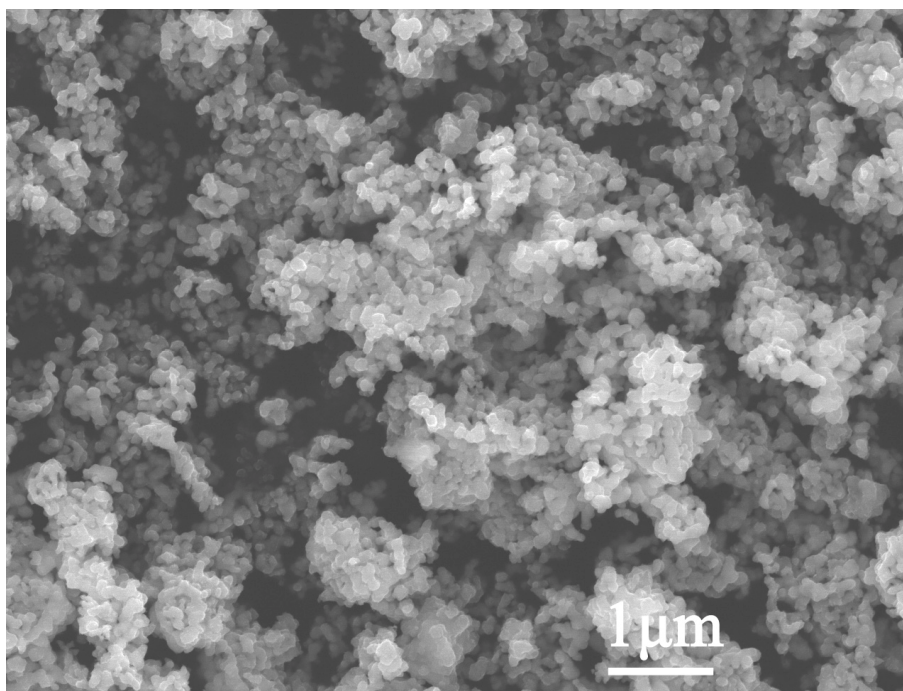

**Fig. S4** FESEM image of the products obtained in the absence of PVP.

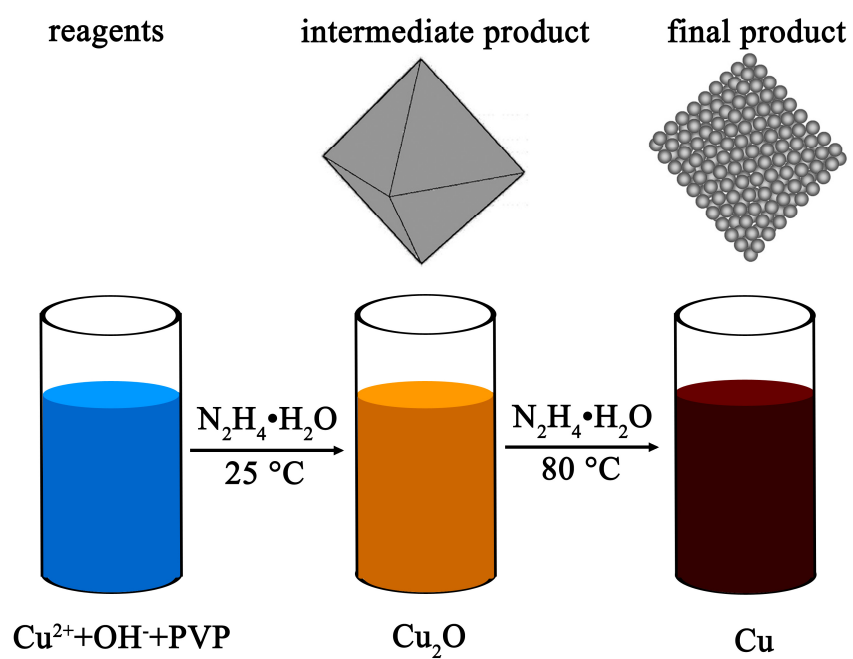

**Fig. S5** A schematic illustration of the formation process of the as-prepared octahedral copper hierarchical nanostructures.
